# Supplementary material for: Modeling the aging process of black carbon during atmospheric transport using a new approach: a case study in Beijing
Source: Copernicus journal article supplement (doi:10.5194/acp-19-9663-2019), 2019-07-31
Supplement: Supplementary file 1 [file acp-19-9663-2019-supplement.pdf]

Supplement of Atmos. Chem. Phys., 19, 9663–9680, 2019  
<https://doi.org/10.5194/acp-19-9663-2019-supplement>  
© Author(s) 2019. This work is distributed under  
the Creative Commons Attribution 4.0 License.

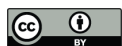

*Supplement of*

## **Modeling the aging process of black carbon during atmospheric transport using a new approach: a case study in Beijing**

**Yuxuan Zhang et al.**

*Correspondence to:* Qiang Zhang (qiangzhang@tsinghua.edu.cn) and Yu Bo (boyu@mail.iap.ac.cn)

The copyright of individual parts of the supplement might differ from the CC BY 4.0 License.

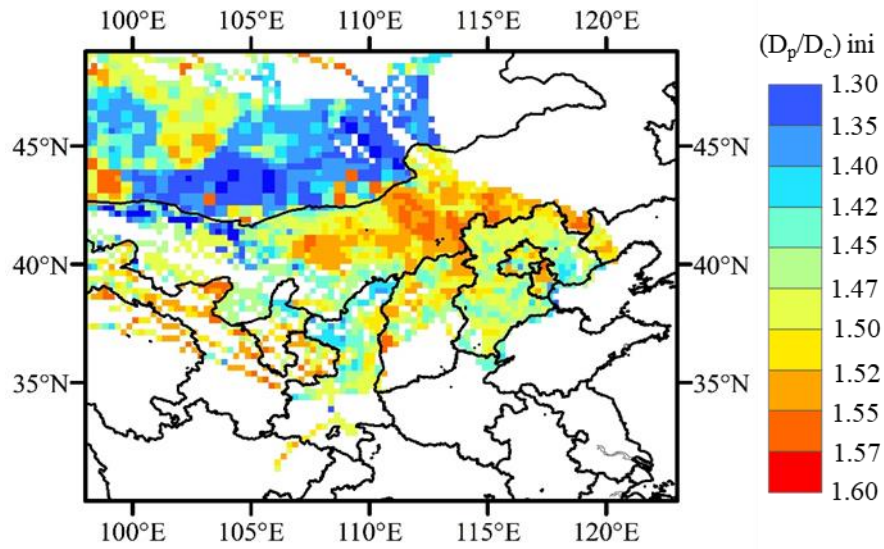

1

2 Figure S1. The  $(D_p/D_c)_{ini}$  of BC particles at emission origins ( $0.25^\circ \times 0.25^\circ$ ) during the  
 3 BJNOV2014 campaign period.
